# Supplementary material for: SPiCE: a web-based tool for sequence-based protein classification and exploration
Source: Springer Nature journal article supplement (doi:10.1186/1471-2105-15-93), 2014-03-31
Supplement: 12859_2013_6329_MOESM7_ESM.pdf [file 12859_2013_6329_MOESM7_ESM.pdf]

| id       | feature category       | parameter settings    | feature      | t-value |
|----------|------------------------|-----------------------|--------------|---------|
| aac_1_A1 | amino acid composition | number of segments: 1 | A, segment 1 | 16.95   |
| aac_1_V1 | amino acid composition | number of segments: 1 | V, segment 1 | 12.60   |
| aac_1_G1 | amino acid composition | number of segments: 1 | G, segment 1 | 11.48   |
| aac_1_E1 | amino acid composition | number of segments: 1 | E, segment 1 | 5.88    |
| aac_1_D1 | amino acid composition | number of segments: 1 | D, segment 1 | 4.11    |
| aac_1_K1 | amino acid composition | number of segments: 1 | K, segment 1 | 1.89    |
| aac_1_Y1 | amino acid composition | number of segments: 1 | Y, segment 1 | -0.52   |
| aac_1_W1 | amino acid composition | number of segments: 1 | W, segment 1 | -1.07   |
| aac_1_F1 | amino acid composition | number of segments: 1 | F, segment 1 | -1.12   |
| aac_1_C1 | amino acid composition | number of segments: 1 | C, segment 1 | -1.90   |
| aac_1_I1 | amino acid composition | number of segments: 1 | I, segment 1 | -2.44   |
| aac_1_Q1 | amino acid composition | number of segments: 1 | Q, segment 1 | -2.53   |
| aac_1_L1 | amino acid composition | number of segments: 1 | L, segment 1 | -3.22   |
| aac_1_M1 | amino acid composition | number of segments: 1 | M, segment 1 | -3.22   |
| aac_1_P1 | amino acid composition | number of segments: 1 | P, segment 1 | -3.32   |
| aac_1_T1 | amino acid composition | number of segments: 1 | T, segment 1 | -3.62   |
| aac_1_H1 | amino acid composition | number of segments: 1 | H, segment 1 | -3.68   |
| aac_1_R1 | amino acid composition | number of segments: 1 | R, segment 1 | -4.45   |
| aac_1_N1 | amino acid composition | number of segments: 1 | N, segment 1 | -11.29  |
| aac_1_S1 | amino acid composition | number of segments: 1 | S, segment 1 | -13.54  |
